# Supplementary material
Source: PubMed Central journal article supplement (PMC3890710)
Supplement: tlo0606_0749SD1.pdf [file tlo0606_0749SD1.pdf]

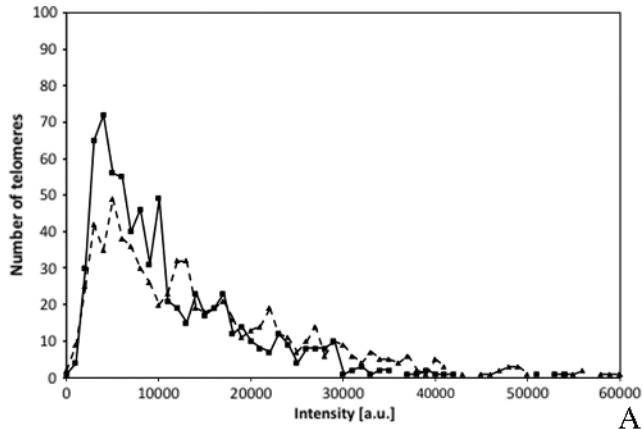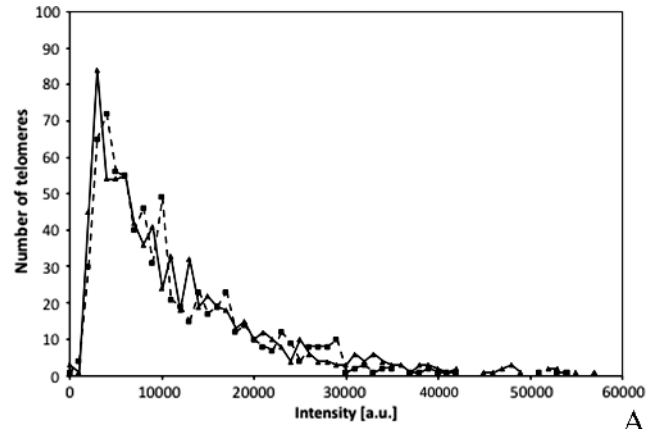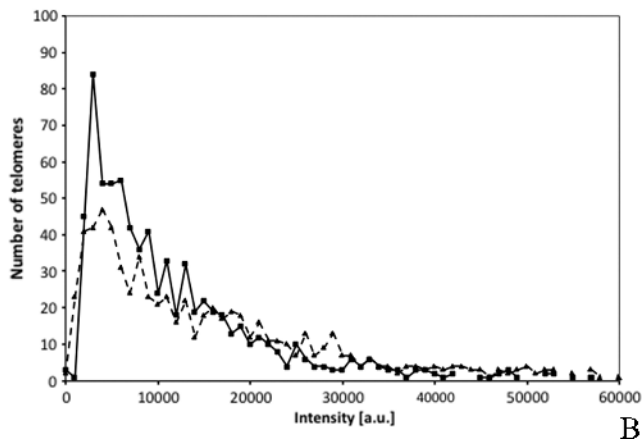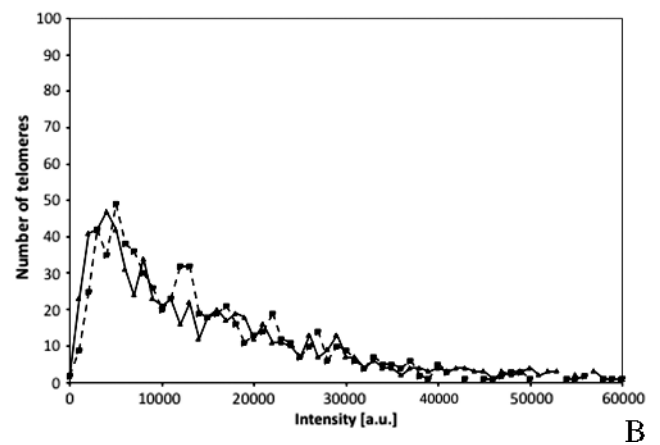

**Figure W1.** Telomere intensities of normal and neoplastic lymphocytes isolated from BM aspirates. Squares (■) represent neoplastic cells, and triangles (▲) represent normal cells. CD138<sup>+</sup> cells (Figure 1A) show the same profile as 3D fixed cells (Figure 1B).

**Figure W2.** Comparison of the telomere profiles of myeloma cells. The profiles obtained from CD138-labeled cells (■) and that of 3D fixed large cells (▲) are identical (A) as well as that of CD138<sup>-</sup> cells (■) and the 3D fixed small cells (▲) as shown in B.

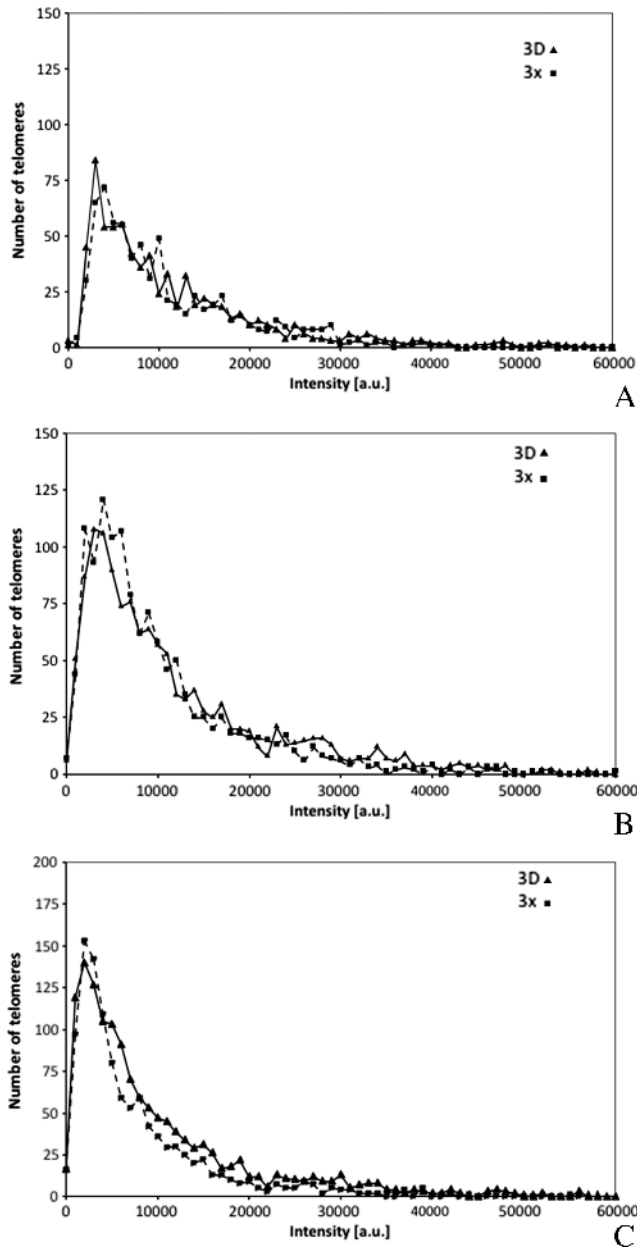

**Figure W3.** (A–C) Analysis of the telomeric profiles of blood samples and BM samples after CD138 labeling (■) and 3D fixation (▲). The profiles are from MB0133 (BM), MB0144 (blood), and MB0157 (BM).
